## CORRECTION

# Correction: Unusual sound production mechanism in the triggerfish *Rhinecanthus aculeatus* (Balistidae)

**Eric Parmentier, Xavier Raick, David Lecchini, Kelly Boyle, Sam Van Wassenbergh, Frédéric Bertucci and Loïc Kéver**

There was an error published in *J. Exp. Biol.* **220**, 186-193.

The surname of Sam Van Wassenbergh was incorrectly displayed. This has been corrected in the online full-text and PDF versions.

The authors apologise for any inconvenience this may have caused.
